# Supplementary material for: A Biflavonoid-Rich Extract from Selaginella doederleinii Hieron. against Throat Carcinoma via Akt/Bad and IKKβ/NF-κB/COX-2 Pathways
Source: MDPI journal article supplement (doi:10.3390/ph15121505), 2022-12-02
Supplement: s1 [file s1]

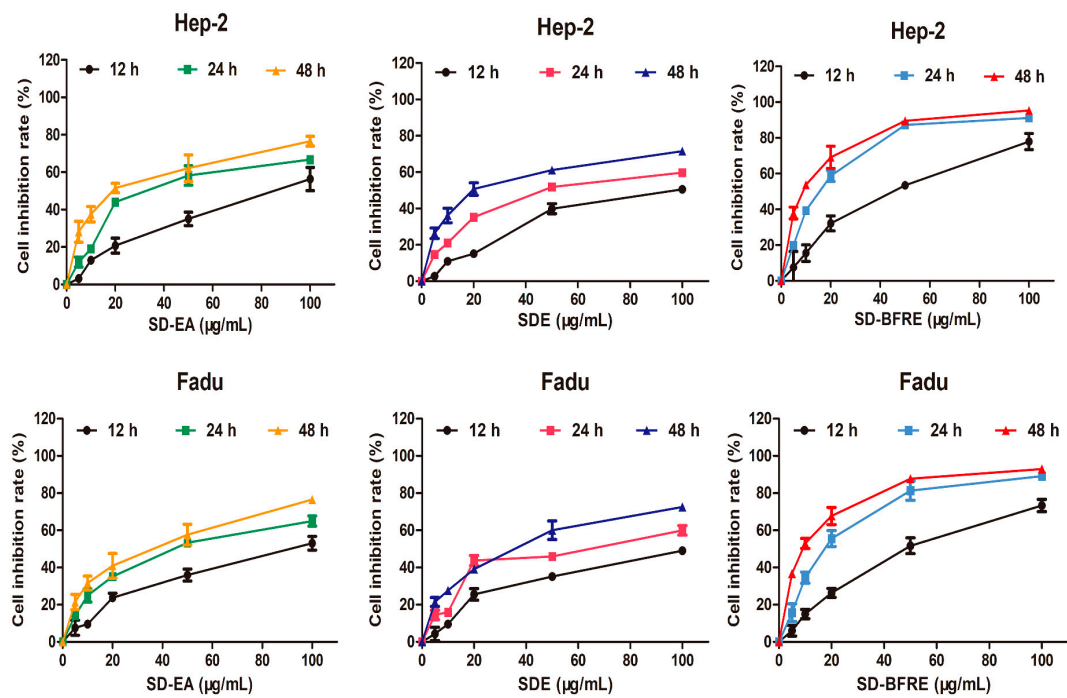

Cytotoxic activity of SD-BFRE,SD-EA,SDE against  
Hep-2 (Mean $\pm$ SD,n=3)

| Times (h) | IC <sub>50</sub> (µg/mL) |                  |                  |
|-----------|--------------------------|------------------|------------------|
|           | SD-BFRE                  | SD-EA            | SDE              |
| 12        | 39.94 $\pm$ 3.04         | 80.94 $\pm$ 7.30 | 89.03 $\pm$ 5.15 |
| 24        | 14.29 $\pm$ 0.61         | 36.16 $\pm$ 2.60 | 43.82 $\pm$ 3.11 |
| 48        | 8.46 $\pm$ 0.74          | 20.08 $\pm$ 2.01 | 28.48 $\pm$ 4.83 |

Cytotoxic activity of SD-BFRE,SD-EA,SDE against  
FaDu (Mean $\pm$ SD,n=3)

| Times (h) | IC <sub>50</sub> (µg/mL) |                  |                  |
|-----------|--------------------------|------------------|------------------|
|           | SD-BFRE                  | SD-EA            | SDE              |
| 12        | 44.20 $\pm$ 1.70         | 89.03 $\pm$ 5.15 | 97.30 $\pm$ 1.95 |
| 24        | 16.94 $\pm$ 1.60         | 43.82 $\pm$ 3.11 | 53.68 $\pm$ 3.37 |
| 48        | 8.88 $\pm$ 0.95          | 28.08 $\pm$ 4.83 | 33.14 $\pm$ 3.81 |

**Figure S1:** Cell inhibition rate of Hep-2 and FaDu cells after they were respectively incubated different concentration gradients of SD-BFRE, SD-EA, SDE for 12 h, 24 h or 48 h.
