# Supplementary material for: A Biflavonoid-Rich Extract from Selaginella doederleinii Hieron. against Throat Carcinoma via Akt/Bad and IKKβ/NF-κB/COX-2 Pathways
Source: MDPI journal article supplement (doi:10.3390/ph15121505), 2022-12-02
Supplement: s1 [file s1]

**Table S1** The peak area integration of biflavonoid from SD-BFRE by UPLC-PDA

| No. | <i>t<sub>R</sub></i><br>( <i>min</i> ) | Molecular<br>ion(m/z) | Area<br>$\mu\text{V}\cdot\text{Sec}$ | Area% | Compound                                       |
|-----|----------------------------------------|-----------------------|--------------------------------------|-------|------------------------------------------------|
| 1   | 12.81                                  | 537.0807              | 28044707                             | 37.99 | Amentoflavone                                  |
| 2   | 13.99                                  | 538.0969              | 1101145                              | 1.49  | 2,3-Dihydro-3',3'''-biapigenin                 |
| 3   | 14.06                                  | 541.1167              | 5545192                              | 7.51  | 2,3,2'',3'''-Tetrahydroochnaflavone            |
| 4   | 15.00                                  | 539.1029              | 6250411                              | 8.47  | 2, 3-dihydroochnaflavone                       |
| 5   | 15.21                                  | 537.1248              | 2474981                              | 3.35  | Delicaflavone                                  |
| 6   | 15.22                                  | 537.1096              | 1805727                              | 2.45  | Ochnaflavone                                   |
| 7   | 15.37                                  | 537.0983              | 1366105                              | 1.85  | Hinokiflavone                                  |
| 8   | 16.06                                  | 551.0997              | 1205544                              | 1.63  | Bilobetin                                      |
| 9   | 16.84                                  | 565.1285              | 1820240                              | 2.47  | Ginkgetin                                      |
| 10  | 17.18                                  | 551.0983              | 2717065                              | 3.68  | Podocarpusflavone A                            |
| 11  | 18.83                                  | 579.1281              | 7505061                              | 10.17 | Heveaflavone                                   |
| 12  | 20.82                                  | 593.1569              | 4040694                              | 5.47  | 7,4',7'',4'''-Tetra-<br>O-methyl-amentoflavone |
