# Supplementary figures and images for: A Biflavonoid-Rich Extract from Selaginella doederleinii Hieron. against Throat Carcinoma via Akt/Bad and IKKβ/NF-κB/COX-2 Pathways
Source: MDPI journal article supplement (doi:10.3390/ph15121505), 2022-12-02

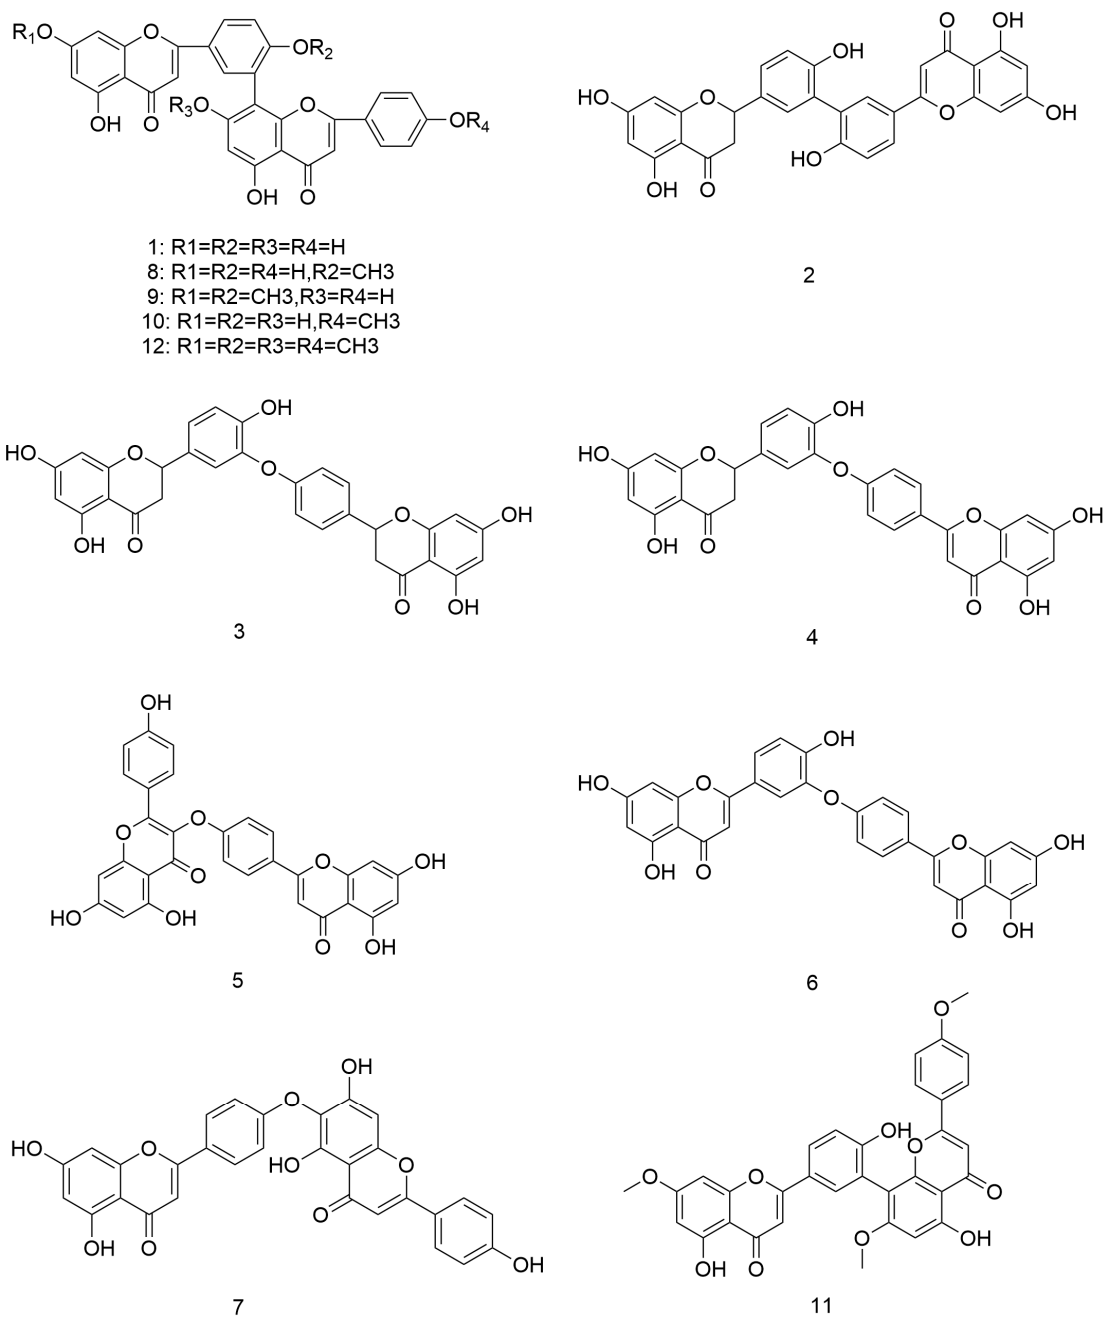

**Figure S2:** The chemical structure of 12 biflavonoids identified from SD-BFRE by UPLC-Q-TOF-MS.

Supplement: s1 [file s1]
